# Supplementary material for: Impact of Charged Particle Exposure on Homologous DNA Double-Strand Break Repair in Human Blood-Derived Cells
Source: PubMed Central journal article supplement (PMC4641431; doi:10.3389/fonc.2015.00250), 2015-11-11
Supplement: image_1.pdf [file image_1.pdf]

A)

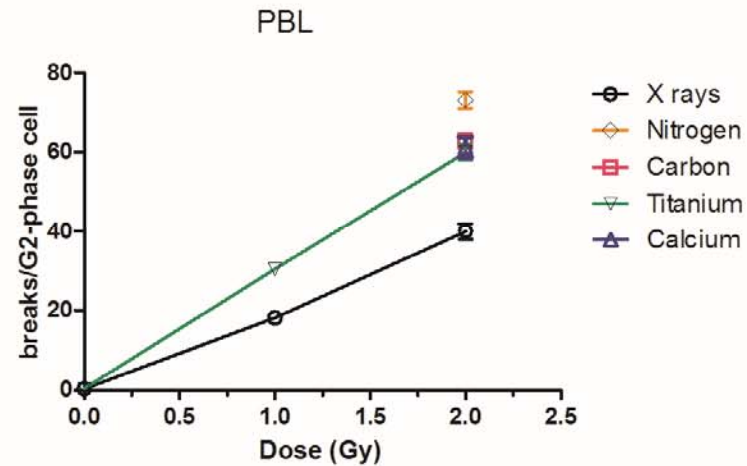

B)

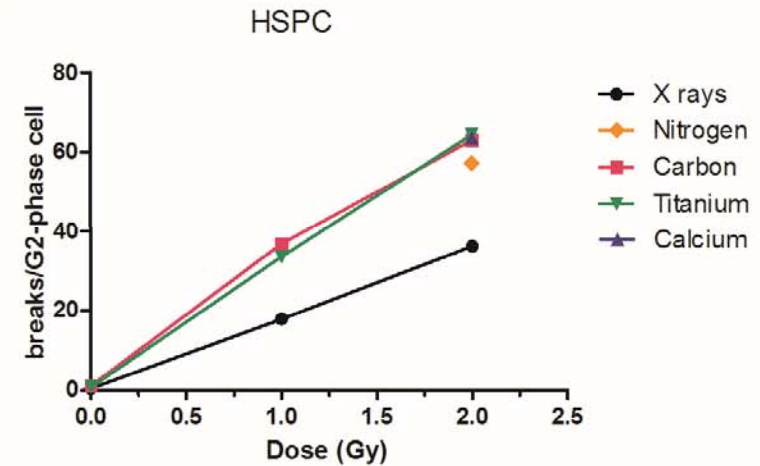

### Supplementary figure S1: Initial induction of chromosomal breaks after radiation exposure.

PBL and HSPC were cultured for 72h followed by irradiation with X rays, nitrogen (45-65keV/ $\mu\text{m}$ ), carbon (60-85 keV/ $\mu\text{m}$ ), titanium (150keV/ $\mu\text{m}$ ) or calcium (180keV/ $\mu\text{m}$ ). Premature chromosome condensation (PCC) was induced immediately after radiation exposure by adding Calyculin A. Slides were stained with Giemsa and at least 50 G<sub>2</sub> phase cells were scored per data point. For X rays three independent experiments were performed, for nitrogen, carbon, titanium and calcium one experiment each. Mean values and SEM are indicated. If N=1 SEM was calculated from SD of all analyzed nuclei (>50). For X rays SEM was calculated from mean values derived from independent experiments. For nitrogen, carbon, titanium and calcium SEM was calculated from values attributed to individual nuclei (>50). Connecting lines serve to guide the eye.

(A) PBL

(B) HSPC
